# Supplementary material for: A single question about a respondent’s perceived financial ability to pay monthly bills explains more variance in health utility scores than absolute income and assets questions
Source: Springer Nature journal article supplement (doi:10.1007/s11136-016-1269-7), 2016-03-21
Supplement: MOESM1 [file 10682904]

**Supplemental Table 1:** Weighteda cross tabulation of household income category and difficulty meeting monthly bills in black and white adults ≥35 years old from the 2005/2006 National Health Measurement Study (n = 3666).a

| **Household Income Category** | **Difficulty Meeting Monthly Bills** | | | | | |
| --- | --- | --- | --- | --- | --- | --- |
| **Extremely Difficult**  **n (column %)** | **Very Difficult**  **n (column %)** | **Somewhat Difficult**  **n (column %)** | **Slightly Difficult**  **n (column %)** | **Not Difficult At All**  **n (column %)** | **Total**  **N** |
| **<$10,000** | 21 (21) | 23 (16) | 25 (5) | 15 (2) | 27 (1) | 111 |
| **$10,000-$14,999** | 19 (19) | 18 (13) | 29 (6) | 14 (2) | 21 (1) | 101 |
| **$15,000-$19,000** | 17 (17) | 13 (9) | 47 (10) | 27 (4) | 52 (3) | 157 |
| **$20,000-$24,999** | 14 (14) | 20 (14) | 24 (5) | 47 (7) | 63 (3) | 168 |
| **$25,000-$34,999** | 20 (20) | 19 (14) | 87 (19) | 65 (10) | 145 (7) | 337 |
| **$35,000-$49,999** | 3 (3) | 14 (10) | 81 (17) | 103 (16) | 291 (15) | 493 |
| **$50,000-$74,999** | 7 (7) | 26 (19) | 93 (20) | 165 (25) | 435 (22) | 726 |
| **≥$75,000** | 2 (2) | 7 (5) | 82 (18) | 224 (34) | 939 (48) | 1252 |
| **Total** | 102 | 140 | 468 | 661 | 1973 | 3344 |

a sampling and post-stratification weights to adjust results to the U.S. adult population.

b all weighted counts were rounded.

**Supplemental Table 2:** Weighteda cross tabulation of asset category and difficulty meeting monthly bills in black and white adults ≥35 years old from the 2005/2006 National Health Measurement Study (n = 3666).b

| **Asset Category** | **Difficulty Meeting Monthly Bills** | | | | | |
| --- | --- | --- | --- | --- | --- | --- |
| **Extremely Difficult (column %)** | **Very Difficult (column %)** | **Somewhat Difficult (column %)** | **Slightly Difficult (column %)** | **Not Difficult at All (column %)** | **Total** |
| **<$10,000** | 87 (80) | 94 (67) | 177 (39) | 131 (20) | 129 (7) | 618 |
| **$10,000-$24,999** | 9 (8) | 19 (13) | 60 (13) | 126 (20) | 228 (12) | 442 |
| **$25,000-$49,999** | 8 (7) | 17 (12) | 89 (20) | 119 (19) | 240 (13) | 474 |
| **$50,000-$74,999** | 5 (5) | 3 (2) | 31 (7) | 75 (12) | 171 (9) | 285 |
| **$75,000-$99,000** | 0 (0) | 3 (2) | 27 (6) | 44 (7) | 186 (10) | 260 |
| **≥$100,000** | 0 (0) | 5 (4) | 64 (14) | 148 (23) | 944 (50) | 1161 |
| **Total** | 109 | 141 | 449 | 642 | 1899 | 3239 |

a sampling and post-stratification weights to adjust results to the U.S. adult population.

b all weighted counts were rounded.

**Supplemental Table 3**. Health utility measures regressed (weighted least squares) on three models in black and white adults ≥35 years old from the 2005/2006 National Health Measurement Study (n = 3666). Reference categories are “income ≥$75,000,” “assets ≥$100,000,” and “bill payments somewhat or slightly difficult.” All models are adjusted for age, sex, race, education, and eleven chronic health conditions.

| **EQ-5D-3L** | | | | | | | | | |
| --- | --- | --- | --- | --- | --- | --- | --- | --- | --- |
|  | **Model 1** | | | **Model 2** | | | **Model 3** | | |
|  | **β** | **SE** | **P-value** | **β** | **SE** | **P-value** | **β** | **SE** | **P-value** |
| **Income <$20,000** | -0.048 | 0.013 | 0.0002 |  |  |  | -0.029 | 0.012 | 0.014 |
| **Income $20,000 to $34,999** | -0.017 | 0.011 | 0.119 |  |  |  | -0.004 | 0.010 | 0.735 |
| **Income $35,000 to $74,999** | -0.007 | 0.008 | 0.395 |  |  |  | -0.004 | 0.008 | 0.627 |
| **Assets <$25,000** | -0.003 | 0.008 | 0.749 |  |  |  | 0.007 | 0.008 | 0.415 |
| **Assets $25,000 to $99,999** | -0.011 | 0.008 | 0.178 |  |  |  | -0.009 | 0.008 | 0.280 |
| **Bill Payments not difficult** |  |  |  | 0.017 | 0.007 |  | 0.016 | 0.007 | 0.017 |
| **Bill payments very difficult** |  |  |  | -0.084 | 0.015 |  | -0.081 | 0.015 | <.0001 |
| **R-sq** | 0.370 |  |  | 0.388 |  |  | 0.392 |  |  |
|  | | | | | | | | | |
| **HUI3** | | | | | | | | | |
|  | **Model 1** | | | **Model 2** | | | **Model 3** | | |
|  | **β** | **SE** | **P-value** | **β** | **SE** | **P-value** | **β** | **SE** | **P-value** |
| **Income <$20,000** | -0.084 | 0.023 | 0.0003 |  |  |  | -0.059 | 0.022 | 0.007 |
| **Income $20,000 to $34,999** | -0.039 | 0.019 | 0.045 |  |  |  | -0.022 | 0.020 | 0.264 |
| **Income $35,000 to $74,999** | -0.009 | 0.013 | 0.499 |  |  |  | -0.004 | 0.013 | 0.741 |
| **Assets <$25,000** | -0.004 | 0.015 | 0.795 |  |  |  | 0.010 | 0.015 | 0.494 |
| **Assets $25,000 to $99,999** | 0.005 | 0.013 | 0.688 |  |  |  | 0.009 | 0.014 | 0.502 |
| **Bill Payments not difficult** |  |  |  | 0.030 | 0.011 | 0.008 | 0.027 | 0.012 | 0.022 |
| **Bill payments very difficult** |  |  |  | -0.125 | 0.029 | <.0001 | -0.111 | 0.029 | 0.0001 |
| **R-sq** | 0.342 |  |  | 0.354 |  |  | 0.359 |  |  |
|  | | | | | | | | | |
| **SF-6D** | | | | | | | | | |
|  | **Model 1** | | | **Model 2** | | | **Model 3** | | |
|  | **β** | **SE** | **P-value** | **β** | **SE** | **P-value** | **β** | **SE** | **P-value** |
| **Income <$20,000** | -0.037 | 0.013 | 0.003 |  |  |  | -0.023 | 0.012 | 0.057 |
| **Income $20,000 to $34,999** | -0.015 | 0.010 | 0.132 |  |  |  | -0.003 | 0.010 | 0.781 |
| **Income $35,000 to $74,999** | 0.002 | 0.008 | 0.850 |  |  |  | 0.005 | 0.008 | 0.547 |
| **Assets <$25,000** | -0.024 | 0.008 | 0.005 |  |  |  | -0.014 | 0.009 | 0.120 |
| **Assets $25,000 to $99,999** | -0.020 | 0.008 | 0.012 |  |  |  | -0.016 | 0.008 | 0.042 |
| **Bill Payments not difficult** |  |  |  | 0.029 | 0.007 | <.0001 | 0.025 | 0.007 | 0.001 |
| **Bill payments very difficult** |  |  |  | -0.056 | 0.012 | <.0001 | -0.048 | 0.012 | <.0001 |
| **R-sq** | 0.342 |  |  | 0.354 |  |  | 0.361 |  |  |
|  | | | | | | | | | |
| **QWB-SA** | | | | | | | | | |
|  | **Model 1** | | | **Model 2** | | | **Model 3** | | |
|  | **β** | **SE** | **P-value** | **β** | **SE** | **P-value** | **β** | **SE** | **P-value** |
| **Income <$20,000** | -0.017 | 0.015 | 0.261 |  |  |  | -0.001 | 0.015 | 0.933 |
| **Income $20,000 to $34,999** | -0.015 | 0.012 | 0.229 |  |  |  | -0.001 | 0.012 | 0.914 |
| **Income $35,000 to $74,999** | -0.003 | 0.009 | 0.709 |  |  |  | 0.000 | 0.009 | 0.999 |
| **Assets <$25,000** | -0.013 | 0.010 | 0.184 |  |  |  | -0.002 | 0.010 | 0.809 |
| **Assets $25,000 to $99,999** | -0.006 | 0.009 | 0.514 |  |  |  | -0.002 | 0.009 | 0.799 |
| **Bill Payments not difficult** |  |  |  | 0.027 | 0.008 | 0.0005 | 0.026 | 0.008 | 0.002 |
| **Bill payments very difficult** |  |  |  | -0.058 | 0.012 | <.0001 | -0.057 | 0.012 | <.0001 |
| **R-sq** | 0.333 |  |  | 0.350 |  |  | 0.350 |  |  |

β: parameter estimate.

**Supplemental Table 4**. Health utility measures regressed (weighted least squares) on three models in black and white adults ≥35 years old from the 2005/2006 National Health Measurement Study (n = 3666). Reference categories are “income ≥$75,000,” “assets ≥$100,000,” and “bill payments somewhat or slightly difficult.” All models are adjusted for age, sex, race, education, cohabitation, number of children in household, and home ownership.

| **EQ-5D-3L** | | | | | | | | | |
| --- | --- | --- | --- | --- | --- | --- | --- | --- | --- |
|  | **Model 1** | | | **Model 2** | | | **Model 3** | | |
|  | **β** | **SE** | **P-value** | **β** | **SE** | **P-value** | **β** | **SE** | **P-value** |
| **Income <$20,000** | -0.073 | 0.017 | <.0001 |  |  |  | -0.042 | 0.015 | 0.007 |
| **Income $20,000 to $34,999** | -0.032 | 0.015 | 0.035 |  |  |  | -0.009 | 0.014 | 0.503 |
| **Income $35,000 to $74,999** | -0.014 | 0.009 | 0.114 |  |  |  | -0.008 | 0.009 | 0.363 |
| **Assets <$25,000** | -0.001 | 0.010 | 0.954 |  |  |  | 0.013 | 0.010 | 0.192 |
| **Assets $25,000 to $99,999** | -0.012 | 0.008 | 0.152 |  |  |  | -0.009 | 0.008 | 0.307 |
| **Bill Payments not difficult** |  |  |  | 0.030 | 0.007 | <.0001 | 0.028 | 0.008 | 0.0002 |
| **Bill payments very difficult** |  |  |  | -0.132 | 0.022 | <.0001 | -0.127 | 0.021 | <.0001 |
| **R-sq** | 0.122 |  |  | 0.174 |  |  | 0.181 |  |  |
|  | | | | | | | | | |
| **HUI3** | | | | | | | | | |
|  | **Model 1** | | | **Model 2** | | | **Model 3** | | |
|  | **β** | **SE** | **P-value** | **β** | **SE** | **P-value** | **β** | **SE** | **P-value** |
| **Income <$20,000** | -0.126 | 0.029 | <.0001 |  |  |  | -0.081 | 0.027 | 0.003 |
| **Income $20,000 to $34,999** | -0.057 | 0.026 | 0.026 |  |  |  | -0.026 | 0.025 | 0.294 |
| **Income $35,000 to $74,999** | -0.018 | 0.016 | 0.250 |  |  |  | -0.009 | 0.016 | 0.583 |
| **Assets <$25,000** | -0.001 | 0.018 | 0.968 |  |  |  | 0.020 | 0.018 | 0.252 |
| **Assets $25,000 to $99,999** | 0.003 | 0.015 | 0.838 |  |  |  | 0.009 | 0.015 | 0.531 |
| **Bill Payments not difficult** |  |  |  | 0.052 | 0.013 | <.0001 | 0.049 | 0.013 | 0.0001 |
| **Bill payments very difficult** |  |  |  | -0.198 | 0.035 | <.0001 | -0.182 | 0.034 | <.0001 |
| **R-sq** | 0.118 |  |  | 0.158 |  |  | 0.166 |  |  |
|  | | | | | | | | | |
| **SF-6D** | | | | | | | | | |
|  | **Model 1** | | | **Model 2** | | | **Model 3** | | |
|  | **β** | **SE** | **P-value** | **β** | **SE** | **P-value** | **β** | **SE** | **P-value** |
| **Income <$20,000** | -0.059 | 0.016 | 0.0002 |  |  |  | -0.033 | 0.015 | 0.025 |
| **Income $20,000 to $34,999** | -0.028 | 0.013 | 0.027 |  |  |  | -0.007 | 0.012 | 0.568 |
| **Income $35,000 to $74,999** | -0.003 | 0.009 | 0.740 |  |  |  | 0.003 | 0.009 | 0.726 |
| **Assets <$25,000** | -0.022 | 0.009 | 0.020 |  |  |  | -0.009 | 0.010 | 0.366 |
| **Assets $25,000 to $99,999** | -0.021 | 0.008 | 0.010 |  |  |  | -0.016 | 0.008 | 0.049 |
| **Bill Payments not difficult** |  |  |  | 0.040 | 0.007 | <.0001 | 0.036 | 0.008 | <.0001 |
| **Bill payments very difficult** |  |  |  | -0.094 | 0.015 | <.0001 | -0.086 | 0.015 | <.0001 |
| **R-sq** | 0.128 |  |  | 0.170 |  |  | 0.179 |  |  |
|  | | | | | | | | | |
| **QWB-SA** | | | | | | | | | |
|  | **Model 1** | | | **Model 2** | | | **Model 3** | | |
|  | **β** | **SE** | **P-value** | **β** | **SE** | **P-value** | **β** | **SE** | **P-value** |
| **Income <$20,000** | -0.049 | 0.020 | 0.012 |  |  |  | -0.020 | 0.018 | 0.280 |
| **Income $20,000 to $34,999** | -0.034 | 0.016 | 0.032 |  |  |  | -0.010 | 0.015 | 0.506 |
| **Income $35,000 to $74,999** | -0.013 | 0.012 | 0.278 |  |  |  | -0.006 | 0.011 | 0.601 |
| **Assets <$25,000** | -0.010 | 0.012 | 0.413 |  |  |  | 0.005 | 0.013 | 0.703 |
| **Assets $25,000 to $99,999** | -0.007 | 0.011 | 0.486 |  |  |  | -0.002 | 0.011 | 0.846 |
| **Bill Payments not difficult** |  |  |  | 0.043 | 0.009 | <.0001 | 0.041 | 0.010 | <.0001 |
| **Bill payments very difficult** |  |  |  | -0.104 | 0.016 | <.0001 | -0.102 | 0.015 | <.0001 |
| **R-sq** | 0.114 |  |  | 0.163 |  |  | 0.164 |  |  |

β: parameter estimate.
